# Supplementary material
Source: PubMed Central journal article supplement (PMC4518833)
Supplement: JB.02433-14_zjb999093684so1.pdf [file JB.02433-14_zjb999093684so1.pdf]

**Table S1:** Primer Sequences used in this study

| <b>Primer Name</b> | <b>Sequence</b>                | <b>Purpose</b> |
|--------------------|--------------------------------|----------------|
| <i>copYFor</i>     | 5' CTTATTGCTGGTCCGCTTCAAC 3'   | qRT-PCR        |
| <i>copYRev</i>     | 5' CGACACTTGCTGCTCTAATGCCTC 3' | qRT-PCR        |
| <i>copAFor</i>     | 5' GGGTCAATCAATGGTCAGGGAAG 3'  | qRT-PCR        |
| <i>copAFor</i>     | 5' CAGCAATCTTGGCAATGGGTG 3'    | qRT-PCR        |
| <i>copZFor</i>     | 5' GACAATGTCACCAAACGC 3'       | qRT-PCR        |
| <i>copZFor</i>     | 5' TGGTTCCTTTCAGTGCTCG 3'      | qRT-PCR        |
| <i>GtfB-For</i>    | 5' ACACTTTCGGGTGGCTTG 3'       | qRT-PCR        |
| <i>GtfB-Rev</i>    | 5' GCTTAGATGTCACTTCGGTTG 3'    | qRT-PCR        |
| <i>GtfC-FOR</i>    | 5' CCAAAATGGTATTATGGCTGTCTG 3' | qRT-PCR        |
| <i>GtfC-REV</i>    | 5' TGAGTCTCTATCAAAGTAACGCAG 3  | qRT-PCR        |
| <i>16SrRNA-FOR</i> | 5' CTTACCAGGTCTTGACATCCCG 3'   | qRT-PCR        |
| <i>16SrRNA-REV</i> | 5' ACCCAACATCTCACGACACGAG 3'   | qRT-PCR        |
| <i>comS-For</i>    | 5' TTTTGATGGGTCTTGACTGG 3'     | qRT-PCR        |
| <i>comS-Rev</i>    | 5' TTTATTACTGTGCCGTGTTAGC 3'   | qRT-PCR        |
| <i>comX-For</i>    | 5' ACTGTTTGTCAAGTGGCGG 3'      | qRT-PCR        |

|                  |                                              |                   |
|------------------|----------------------------------------------|-------------------|
| <i>comX-Rev</i>  | 5' TGCTCTCCTGCTACCAAGCG 3'                   | qRT-PCR           |
| <i>GbpB-For</i>  | 5' AGCAACAGAAGCACAACCATCAG 3'                | qRT-PCR           |
| <i>GbpB-Rev</i>  | 5' CCACCATTACCCAGTAGTTTCC 3'                 | qRT-PCR           |
| <i>copYAZ P1</i> | 5' AGTATGTTTGTAGTCAGTTGCG 3'                 | Gene Deletion     |
| <i>copYAZ P2</i> | 5' <u>GCGCGCCT</u> AATCGTTGAAGCGGACC 3'      | Gene Deletion     |
| <i>copYAZ P3</i> | 5' <u>GGCCGGCC</u> CAGGAAATCCAAGCAAGTGG 3'   | Gene Deletion     |
| <i>copYAZ P4</i> | 5' ATACCAGACTCGCATCATAAGC 3'                 | Gene Deletion     |
| <i>Ermcst- F</i> | 5' <u>GCGCGCC</u> CCGGGCCAAAATTTGTTTGAT 3'   | Gene Deletion     |
| <i>Ermcst- B</i> | 5' <u>GGCCGGCC</u> AGTCGGCAGCGACTCATAGAAT 3' | Gene Deletion     |
| <i>compForE</i>  | 5' <u>GAATTCGAATTC</u> AATGTAGATGAAAGGAGC 3' | Cloning in pIB166 |
| <i>compRevX</i>  | 5' <u>CTCGAGCTCGAG</u> GGTATATGAAGCCTACTT 3' | Cloning in pIB166 |
| <i>compRevX</i>  | 5' <u>CTCGAGCTCGAG</u> GGTATATGAAGCCTACTT 3' | Cloning in pJET   |
| <i>compForP</i>  | 5' <u>CTGCAGCTGCAG</u> AATGTAGATGAAAGGAGC 3' | Cloning in pJET   |

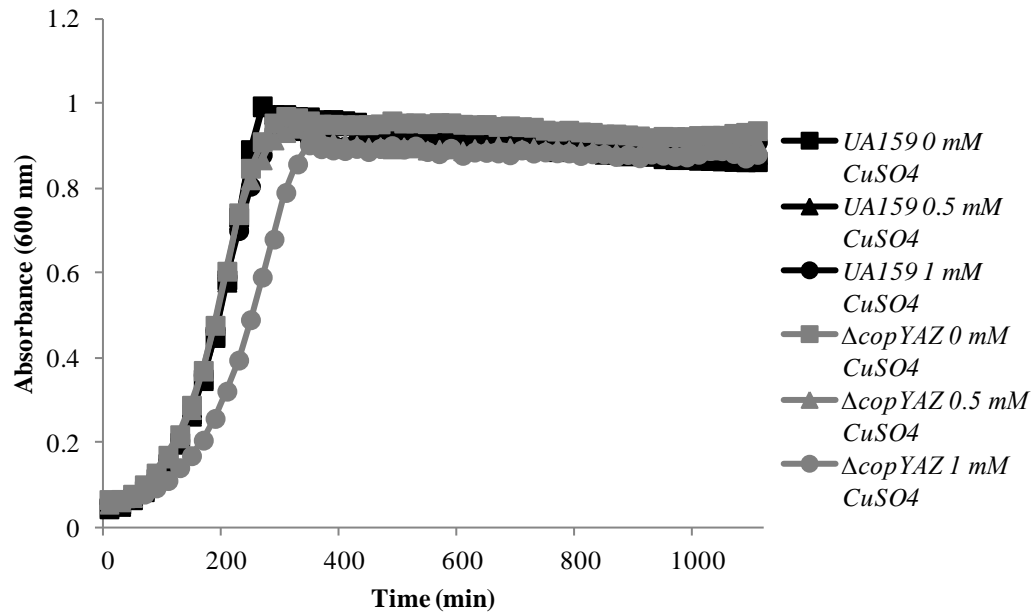

**Figure S1: Growth Kinetics under copper stress:** UA159 and  $\Delta copYAZ$  strains cultivated under varying concentrations of  $CuSO_4$ . Results are the representative of six independent experiments conducted with duplicates for each strain.

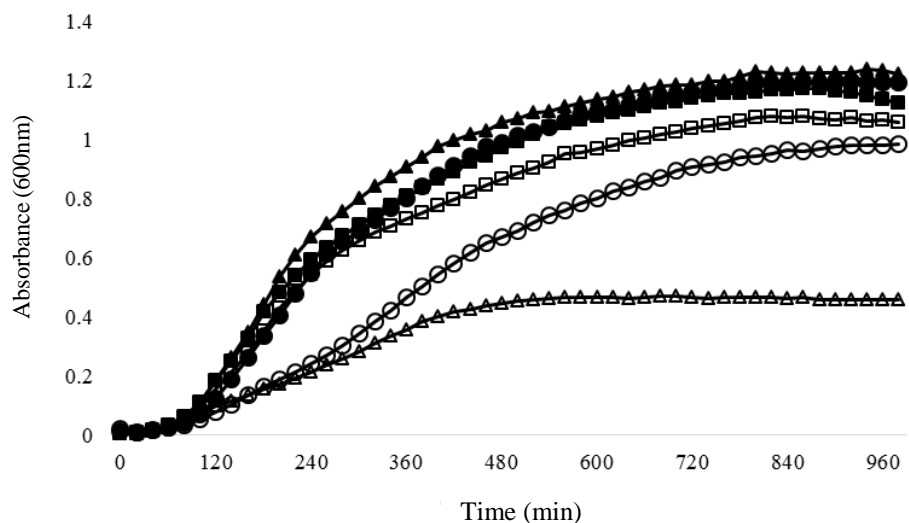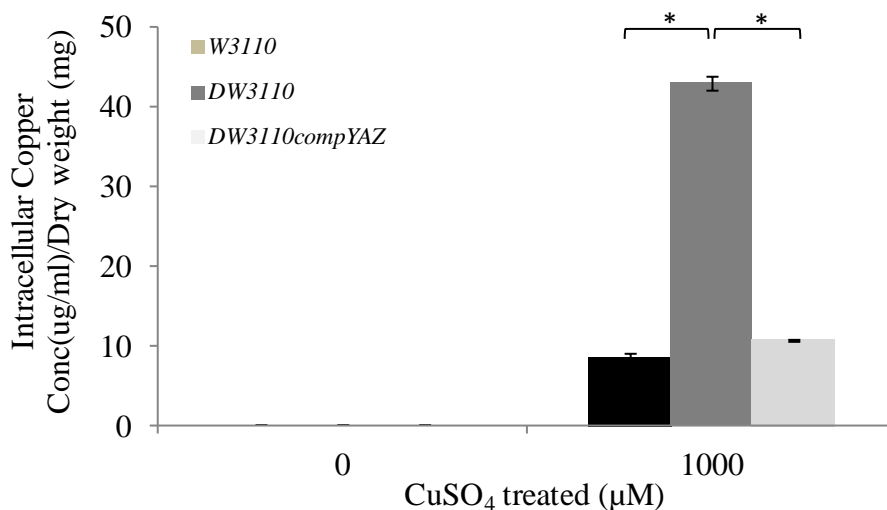

**Figure S2 Growth kinetics and transport studies using *E. coli* strains.** A) *E. coli* strains cultivated in the presence or absence of 2 mM CuSO<sub>4</sub>. Results are representative of six independent experiments conducted with duplicates for each strain. Legend: squares indicate wild type, triangles indicate *cop* mutant, circles indicate complemented strain of *E. coli* strains, solid-filled indicate strains grown in the absence of CuSO<sub>4</sub>, and hollow icons indicate strains grown in the presence of 2 mM CuSO<sub>4</sub>. B) Intracellular copper concentration normalized to dry weight of cells of *E. coli* wild type W3110 (black bar), DW3110 (grey bar), and DW3110*compYAZ* (white bar) was quantified using ICP-AES. Cells were grown in the presence or absence of 1 mM CuSO<sub>4</sub> until the mid-logarithmic growth phase. Cells were lysed and intracellular copper concentration was normalized with cell dry weight. Results shown here are the mean values obtained from three independent experiments  $\pm$  standard error (\**P* < 0.05).

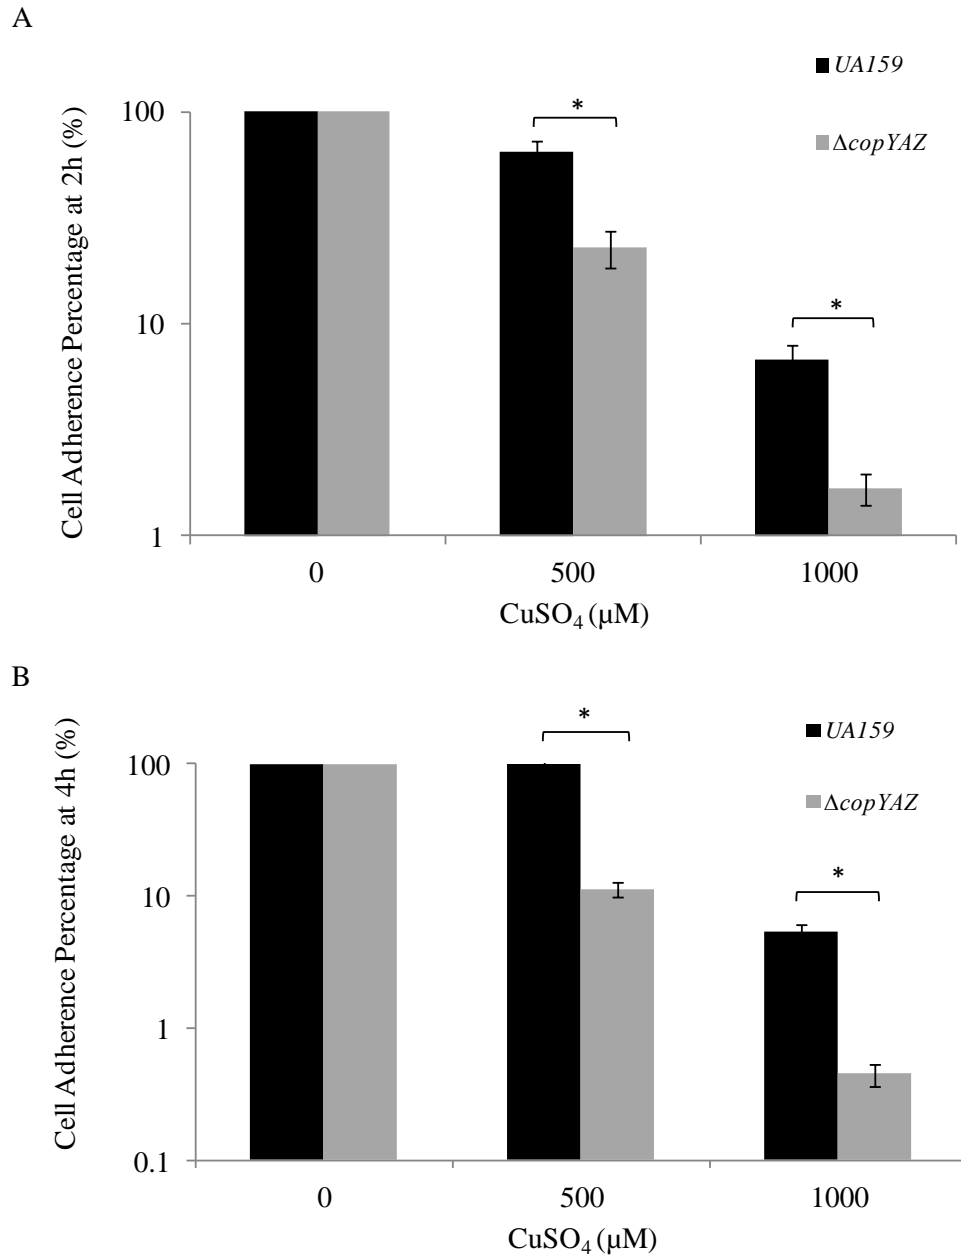

**Figure S3 Cell adherence assays.** Percentage of the cells (log scale) adhered to the polystyrene surface after A) 2h and B) 4h incubation using UA159 (black bars) and  $\Delta copYAZ$  (grey bars) in the presence of varying concentrations of  $CuSO_4$  relative to no copper. Results shown represent the mean values obtained from three independent experiments with three replicates for each strain  $\pm$  standard error ( $*P < 0.05$ ).

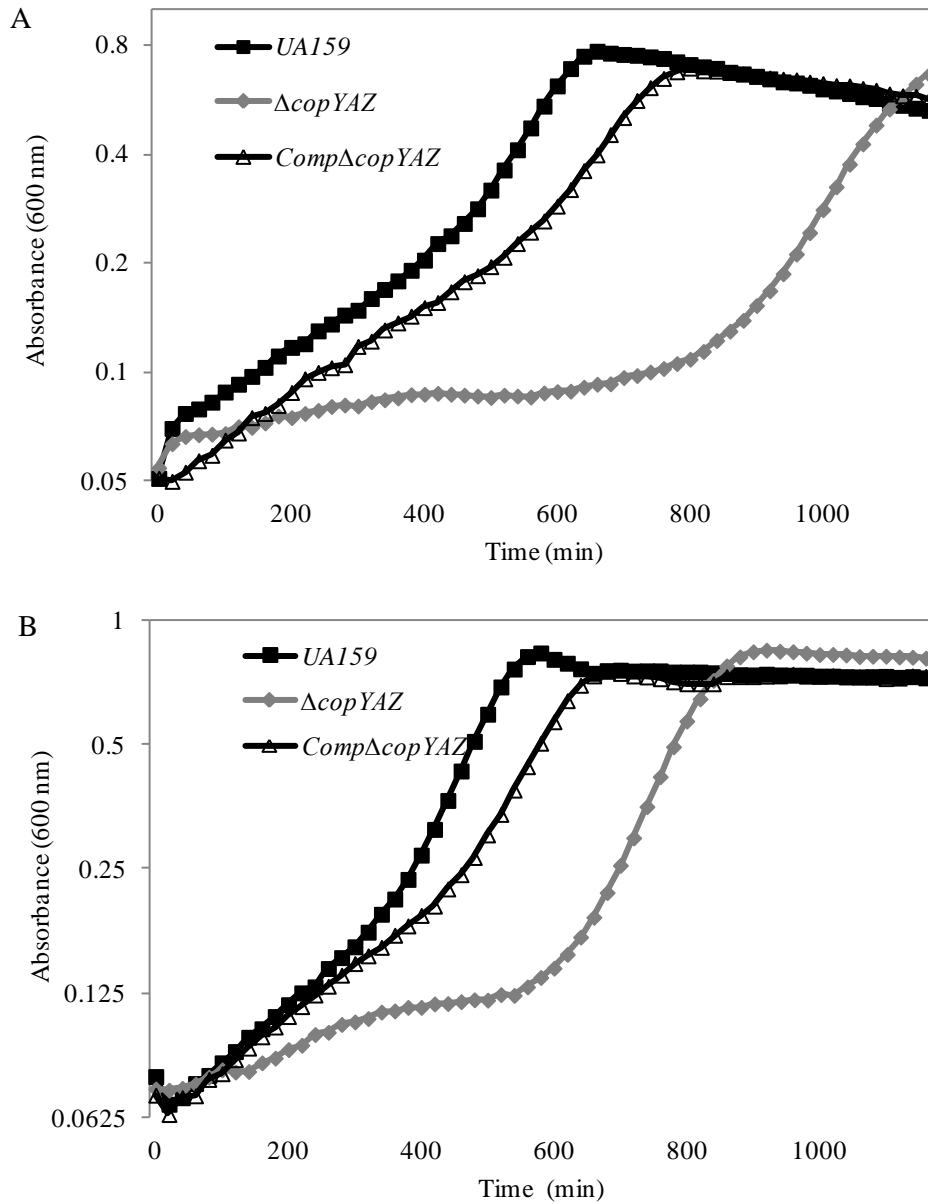

**Figure S4 Growth Kinetics under oxidative stressors: UA159,  $\Delta copYAZ$  and  $comp\Delta copYAZ$  to grown in the presence of the oxidative stressors A) paraquat (25 mM) paraquat and B) H<sub>2</sub>O<sub>2</sub> (0.0045%). Results are the representative of six independent experiments conducted with duplicates for each strain.**

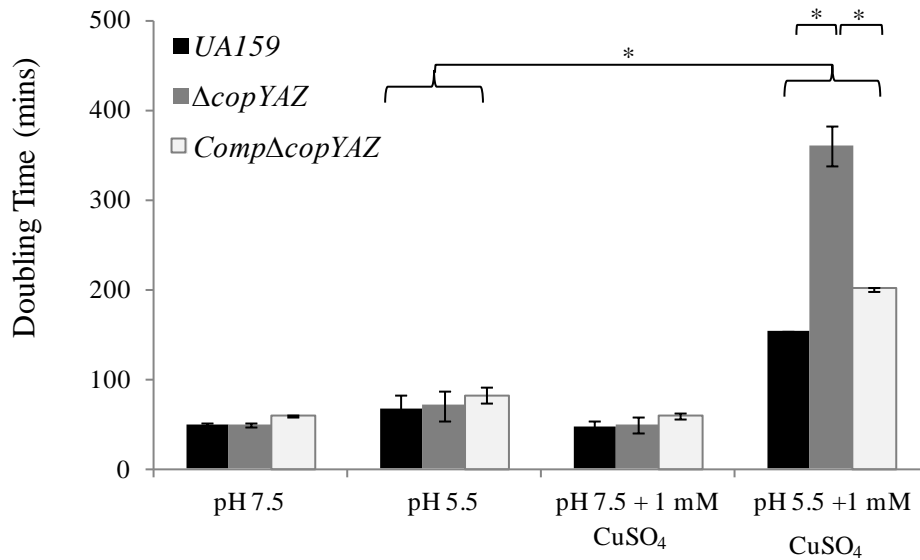

**Figure S5 Doubling times under acid stress with or without copper.** Evaluation of *S. mutans* doubling time in the presence of various stressors using wild type UA159 (black bars),  $\Delta copYAZ$  (grey bars), and *comp* $\Delta copYAZ$  (light grey bars). Results are the mean of three independent experiments with duplicate samples of each strain  $\pm$  standard error (\* $P < 0.05$ ).

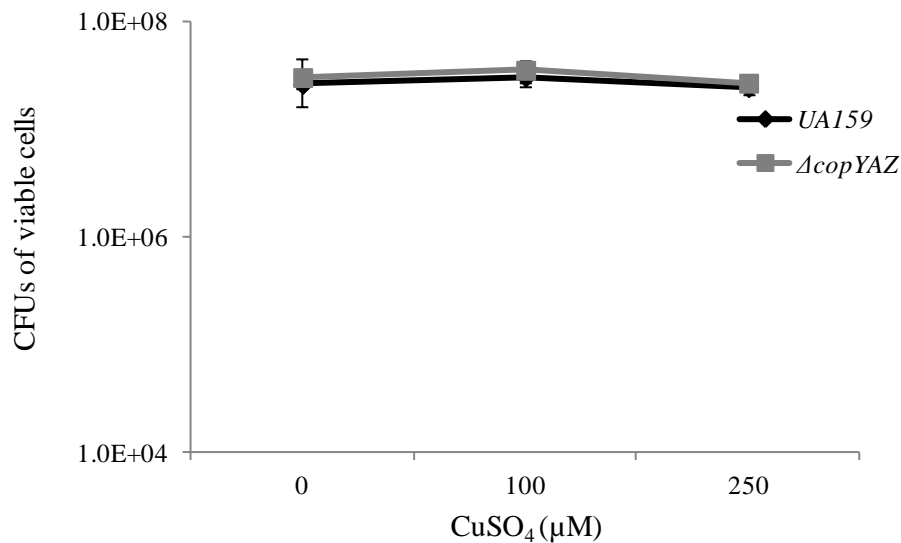

**Figure S6 Colony forming units of viable cells at different copper concentrations.** *S. mutans* colony forming unit of the total viable cells (during the transformation frequency assays) in the presence of varying copper concentrations using wild type UA159 (black line),  $\Delta copYAZ$  (grey line). Results are the mean of three independent experiments with duplicate samples of each strain  $\pm$  standard error (\* $P < 0.05$ ).
